# Supplementary material for: Understanding the role of acid–base interactions using architecturally-controlled, pyridyl-bearing sulfonated phenylated polyphenylenes
Source: Royal Society of Chemistry journal article supplement (doi:10.1039/d0ta08203a), 2020-01-01
Supplement: d0ta08203a1.pdf [file d0ta08203a1.pdf]

**Understanding the role of acid-base interactions using architecturally-  
controlled, pyridyl-bearing sulfonated phenylated polyphenylenes**

Shaoyi Xu\*\*, Yang Wu\*\*, Michael Adamski, Kate Fraser, Steven Holdcroft\*

Holdcroft Research Group Department of Chemistry, Simon Fraser University, 8888  
University Drive, Burnaby, British Columbia, Canada V5A1S6

\*Corresponding author email address: [holdcrof@sfu.ca](mailto:holdcrof@sfu.ca)

\*\**These authors contributed equally to this work*

## Table of contents

|                                                               |           |
|---------------------------------------------------------------|-----------|
| <b>1. Materials .....</b>                                     | <b>3</b>  |
| <b>2. Synthetic pathways .....</b>                            | <b>4</b>  |
| <b>3. Synthetic procedures and membrane preparation .....</b> | <b>5</b>  |
| <b>4. Characterization methods and results .....</b>          | <b>24</b> |
| <b>5. References.....</b>                                     | <b>30</b> |

## 1. Materials

4-Pyridinecarboxaldehyde, 2,5-dibromopyridine, triethylamine (99%, Anachemia Science), 1,4 - dibromonaphthalene (98%), 2-isopropoxy-4,4,5,5-tetramethyl-1,3,2-dioxaborolane (95%) and 1-Bromo-4-iodobenzene (98%) were purchased from Combi-Blocks, Inc. Acetone, dichloromethane (DCM), diethyl ether (reagent grade) methanol (MeOH), petroleum ether (PE), potassium carbonate ( $K_2CO_3$ , reagent grade), tetrahydrofuran (THF) were purchased from Thermo Fisher Scientific. n-butanol, dichloroethane (DCE), dimethyl sulfoxide(DMSO), ethyl acetate (EtOAc) and potassium hydroxide (KOH, reagent grade) were purchased from Caledon Laboratories Ltd. Nitrobenzene (ACS reagent, >99%), trimethylsilyl chlorosulfonate (99%), 2, 5-dibromopyridine (98%), 4'-Bromoacetophenone (98%), tetrakis(triphenylphosphine)palladium(0) (98%), n-Butyllithium solution (2.5 M in hexane), benzaldehyde and 4,4'-diiodobiphenyl (technical grade, 90%) were purchased from Sigma Aldrich Canada Co. Dimethylformamide (DMF, anhydrous HPLC grade) was purchased from J&K Scientific. Anhydrous ethanol was purchased from Commercial Alcohols. Diphenylphosphineferrocene palladium dichloride (97%) was purchased from Strem Chemicals, Inc. 1,3 - (diphenyl)propan-2-one (98%), bisbenzyl (98%), 1,3,5-tribromobenzene (98%) and trimethylsilylethynyl (98%) were purchased from Tokyo Chemical Industry Co., Ltd. America. Diphenylphosphine palladium dichloride (98%) was purchased from Strem Chemicals, Inc. Copper iodide (99.9%) was purchased from Santa Cruz Biotechnology, Inc. Chemicals and organic solvents were used as received except THF was dried with sodium using benzophenone as the indicator.

## 2. Synthetic pathways

### 2.1 Synthesis of the diene monomer, BTCS-TEA (compound 7)

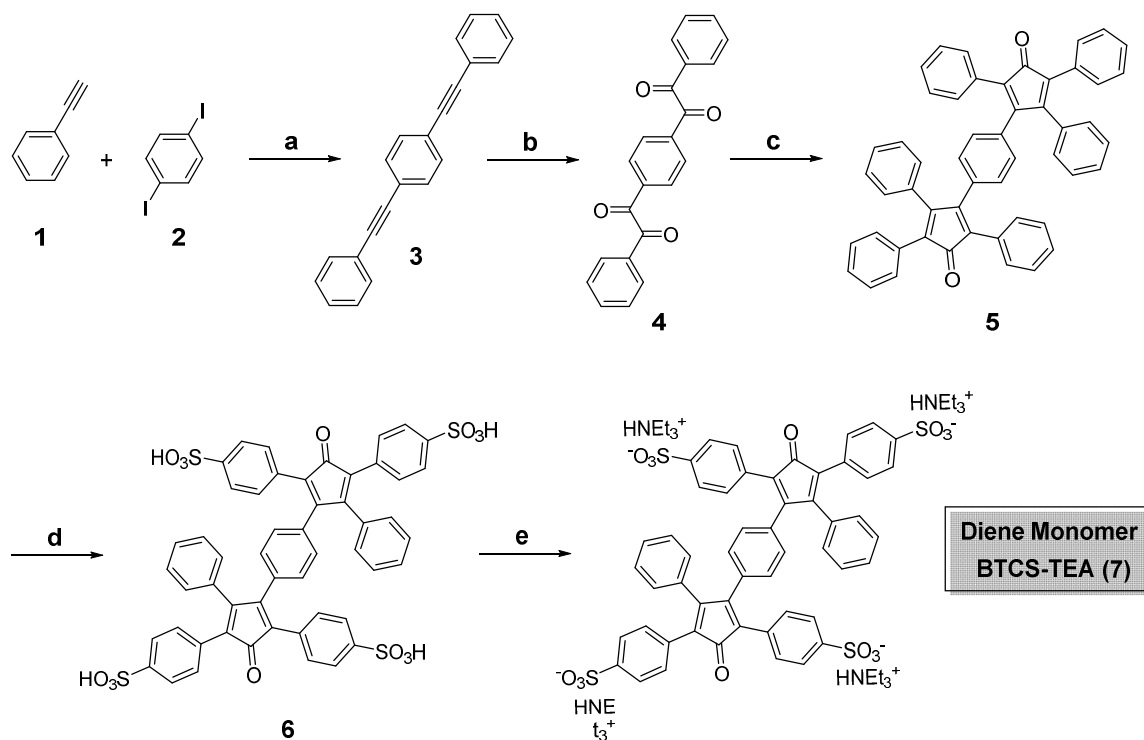

**Figure S 1. Synthesis of diene monomer BTCS-TEA. Reagents and conditions: (a) Pd(PPh<sub>3</sub>)<sub>2</sub>Cl<sub>2</sub>, CuI, TEA, 50 °C, overnight; (b) I<sub>2</sub>, DMSO, 155 °C, overnight; (c) dibenzyl ketone, KOH, reflux, 45 min; (d) TMS-OSO<sub>2</sub>-Cl, DCE, overnight; (e) *n*-BuOH, triethylamine, THF.**

### 3. Synthetic procedures and membrane preparation

#### Synthesis of the diene monomer, BTCS-TEA (7)

The target molecule **7** was synthesized following our previously reported methods and a detailed synthesis (from compound **3** to compound **7**) can be found in the literature.<sup>1,2</sup>

#### Synthesis of dienophile monomers TPP (11) and TPPy (13)

Both the oligophenylene **TPP** (molecule **11**) and 2,4,6-triphenylpyridine derivative **TPPy** (molecule **13**), as well as the intermediate compounds **8** through **10** were synthesized according to our previously reported methodologies.<sup>3</sup>

#### Synthesis of 1-(4-((trimethylsilyl)ethynyl)phenyl)ethan-1-one (12)

Compound **12** was synthesized according to previous literature procedures with some modifications.<sup>4,5</sup> 1-(4-Bromophenyl)ethan-1-one (19.705 g, 100 mmol), Pd(PPh<sub>3</sub>)<sub>2</sub>Cl<sub>2</sub> (701 mg, 1 mmol) and trimethylsilylacetylene (18 mL, 120 mmol) were mixed in a combined solution of 70 mL trimethylamine and 120 mL THF under N<sub>2</sub>. To the solution was added CuI (381 mg, 2 mmol). The mixture was stirred at 50 °C for 18 h. After cooling to RT, the volatiles were removed *in vacuo*. The crude product was purified via flash column chromatography (dichloromethane/hexanes = 1:20). A light yellow oil (18.0 g, 83.3%) was obtained. **<sup>1</sup>H NMR** (CDCl<sub>3</sub>, 400 MHz) δ 7.84 (d, 2H), 7.50 (d, 2H), 2.54 (s, 3H), 0.25 (s, 9H); **<sup>13</sup>C NMR** (CDCl<sub>3</sub>, 100 MHz) δ 196.85, 136.43, 131.97, 129.73, 128.02, 104.05, 97.98, 26.40, -0.21; **HRMS** (EI) *m/z* calculated for C<sub>13</sub>H<sub>17</sub>OSi<sup>+</sup> (M + H<sup>+</sup>) 271.1049, found 217.1040.

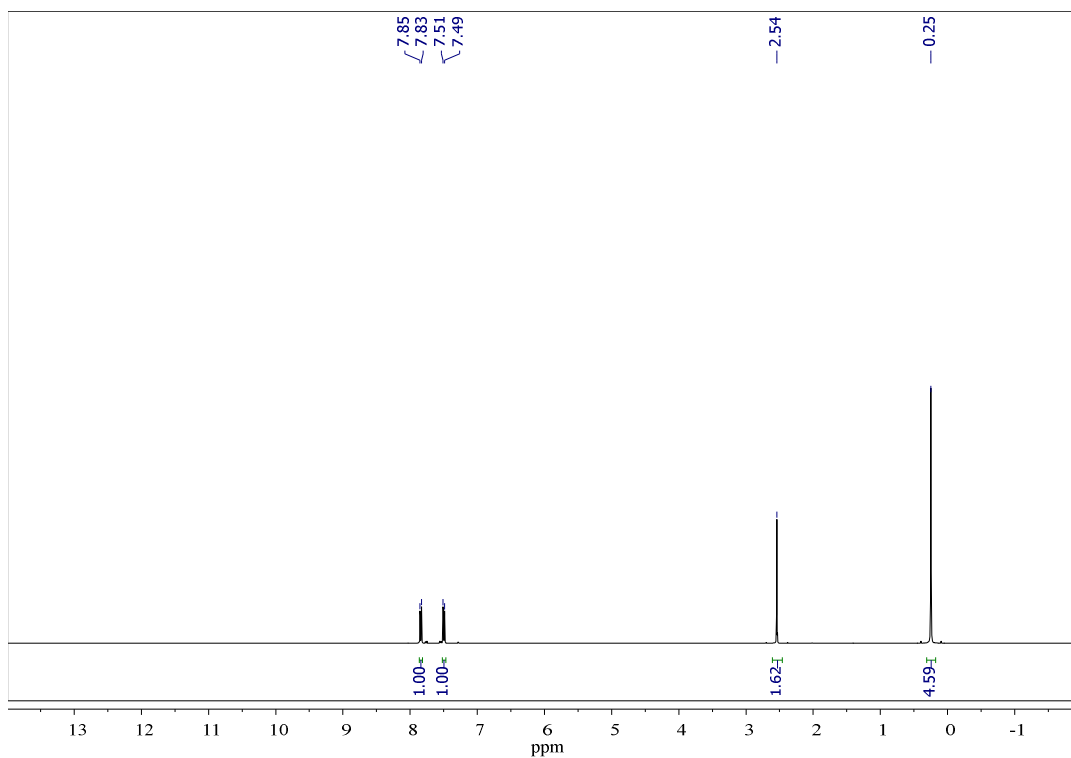

Figure S 2.  $^1\text{H}$  NMR spectrum ( $\text{CDCl}_3$ , 400 MHz) of 12.

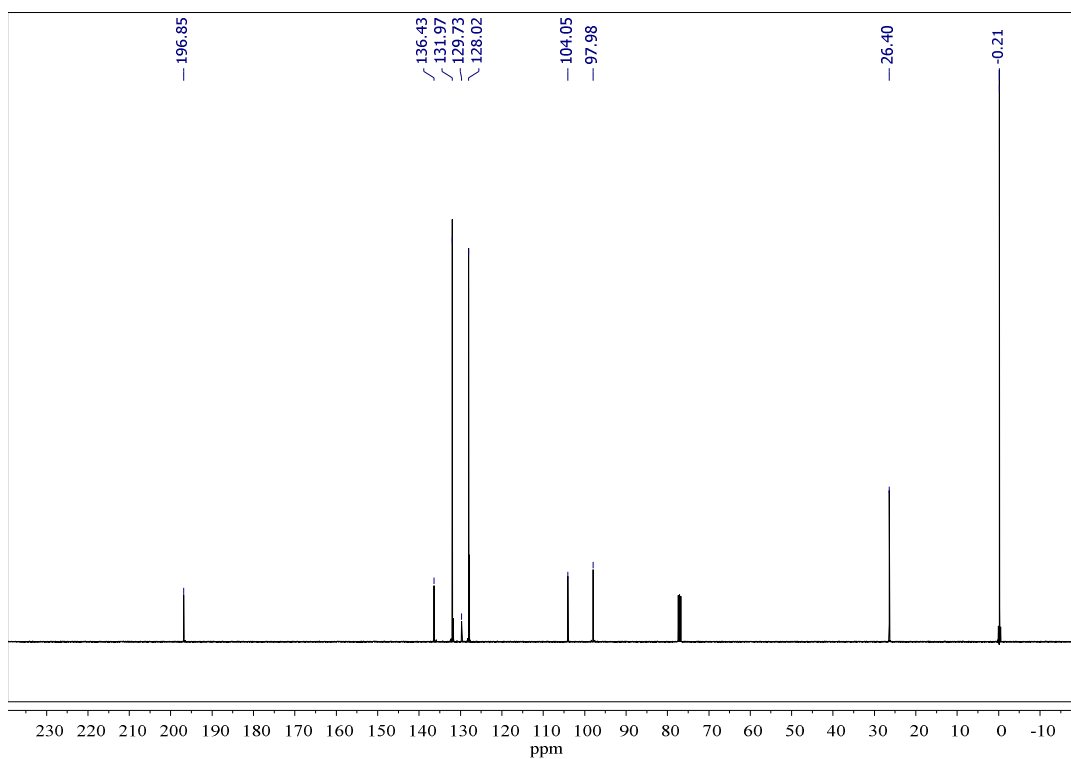

Figure S 3.  $^{13}\text{C}$  NMR spectrum ( $\text{CDCl}_3$ , 100 MHz) of 12.

### Synthesis of 2,6-bis(4-ethynylphenyl)-4,4'-bipyridine (BPBPY, 14)

Compound **14** was synthesized according to a previous literature procedure with some modifications.<sup>6</sup> To a solution of 4-pyridinecarboxaldehyde (536 mg, 5 mmol) in 25 mL ethanol was added 1-(4-((trimethylsilyl)ethynyl)phenyl)ethan-1-one (2.16 g, 10 mmol). Then ammonium hydroxide (14.5 mL, 29.3%) and KOH pellets (561 mg, 10 mmol) were added to the mixture. The reaction was stirred at ambient temperature for 3 days. The crude solid was collected via filtration and washed with ethanol. Purification by flash chromatography (dichloromethane/hexanes = 1:3) gave a white powder (0.26 g, 14.2%). **<sup>1</sup>H NMR** (CDCl<sub>3</sub>, 400 MHz) δ 8.87 (d, 2H), 8.20 (d, 4H), 7.94 (s, 2H), 7.86 (d, 2H), 7.69 (d, 2H), 3.24 (s, 2H); **<sup>13</sup>C NMR** (CDCl<sub>3</sub>, 100 MHz) δ 157.41, 149.39, 147.70, 146.52, 138.71, 132.65, 126.96, 123.52, 122.69, 116.89, 83.30, 78.84. **HRMS** (EI) *m/z* calculated for C<sub>26</sub>H<sub>17</sub>N<sub>2</sub><sup>+</sup> (M + H<sup>+</sup>) 357.1392, found 357.1391

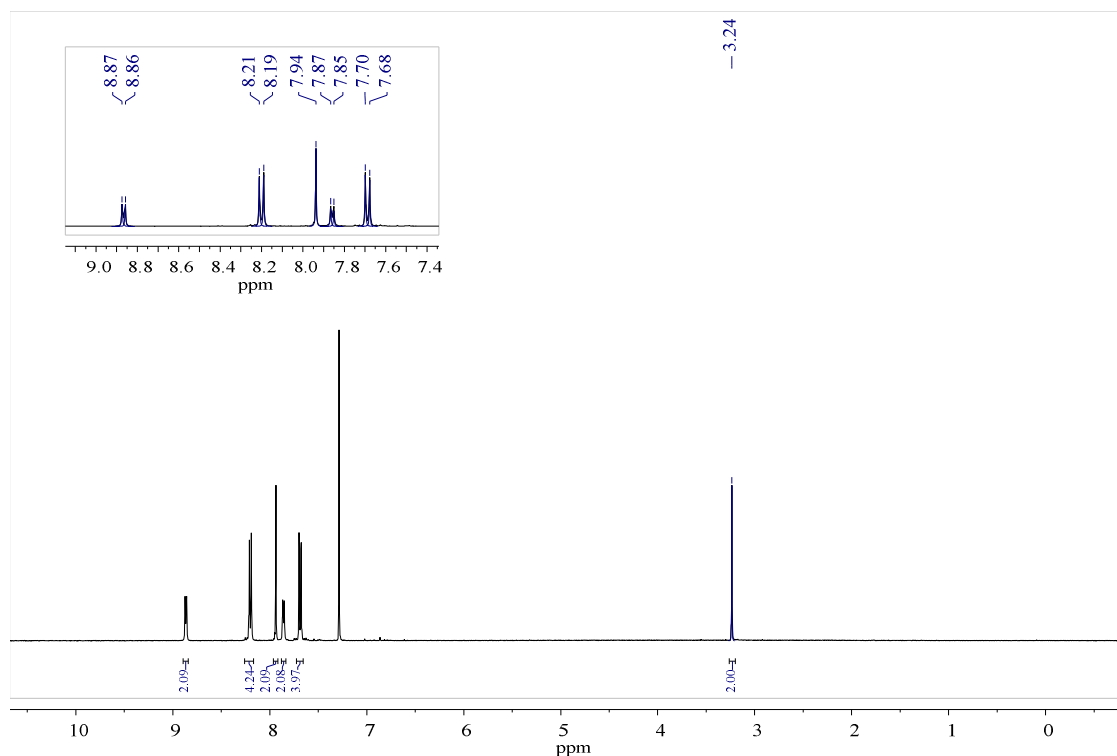

Figure S 4. <sup>1</sup>H NMR spectrum (CDCl<sub>3</sub>, 400 MHz) of 14.

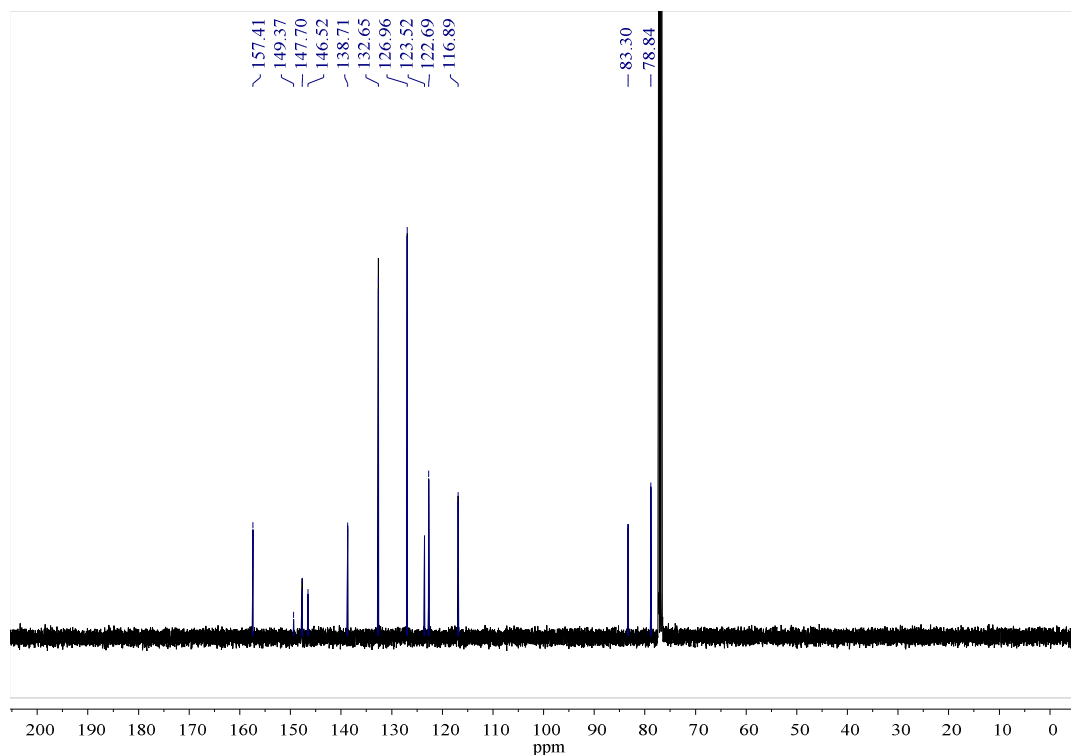

**Figure S 5.**  $^{13}\text{C}$  NMR spectrum ( $\text{CDCl}_3$ , 100 MHz) of **14**.

### Synthesis of 1-(5-bromopyridin-2-yl)ethan-1-one (**15**)

Compound **15** was synthesized according to a previous literature procedure which was modified.<sup>7</sup> To a solution of 2,5-dibromopyridine (3.553 g, 15 mmol) in 60 mL anhydrous toluene was added n-BuLi (2.5 M in hexane, 6.6 mL, 16.5 mmol) dropwise manually within 15 min under Ar at  $-40\text{ }^\circ\text{C}$ . The resulting mixture was stirred for 30 min, after which anhydrous dimethylacetamide (6.6 mL, 22.5 mmol) was added dropwise into the solution within 5 min and the mixture was allowed to warm to RT while stirring for 1 h. 80 mL of saturated  $\text{NH}_4\text{Cl}$  was added to quench the reaction. The product was extracted with dichloromethane (50 mL  $\times$  3). The organic layer was separated and washed with brine and water three times each. Purification via flash column chromatography (ethyl acetate/hexanes = 1:4) yielded the target product as a white solid (2.1 g, 70.0%).  $^1\text{H}$  NMR ( $\text{CDCl}_3$ , 400 MHz)  $\delta$  8.75 (d, 1H), 7.99 (dd, 1H), 7.97 (d, 1H), 2.72 (s, 3H);  $^{13}\text{C}$  NMR ( $\text{CDCl}_3$ , 100 MHz)  $\delta$  199.02, 151.93, 150.14, 139.50, 125.21, 122.88. HRMS (EI)  $m/z$  calculated for  $\text{C}_7\text{H}_7\text{BrNO}^+$  ( $M + \text{H}^+$ ) 199.9711, found 199.9701



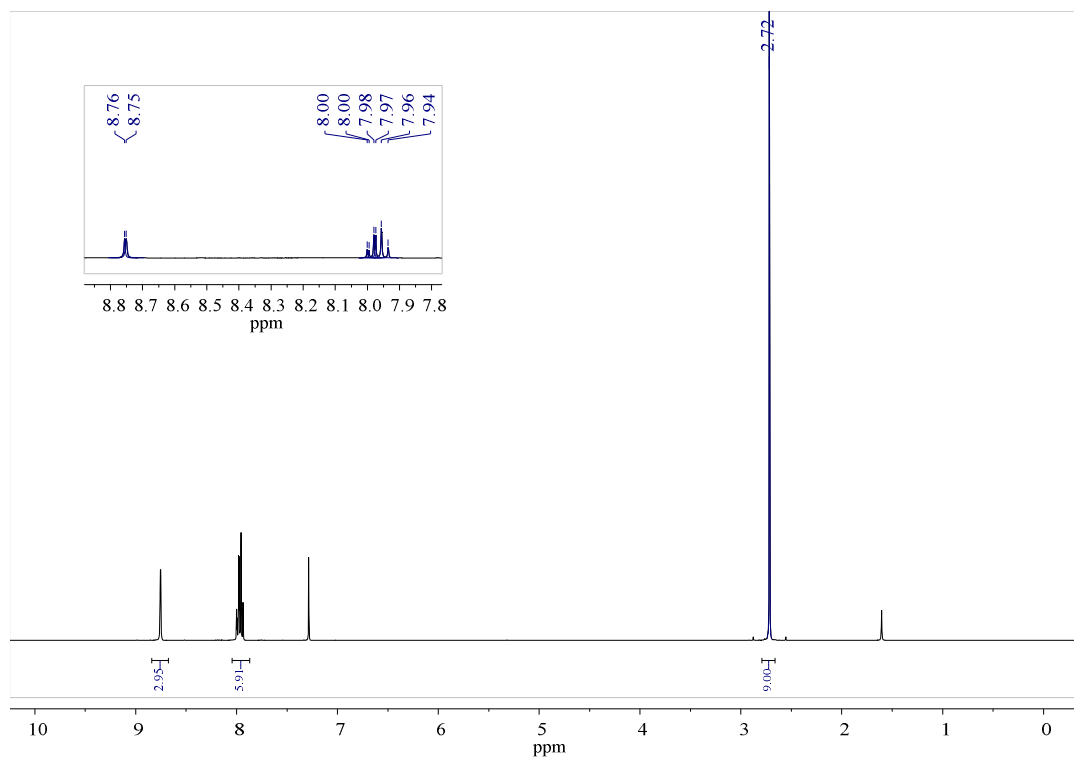

Figure S 6.  $^1\text{H}$  NMR spectrum ( $\text{CDCl}_3$ , 400 MHz) of 15.

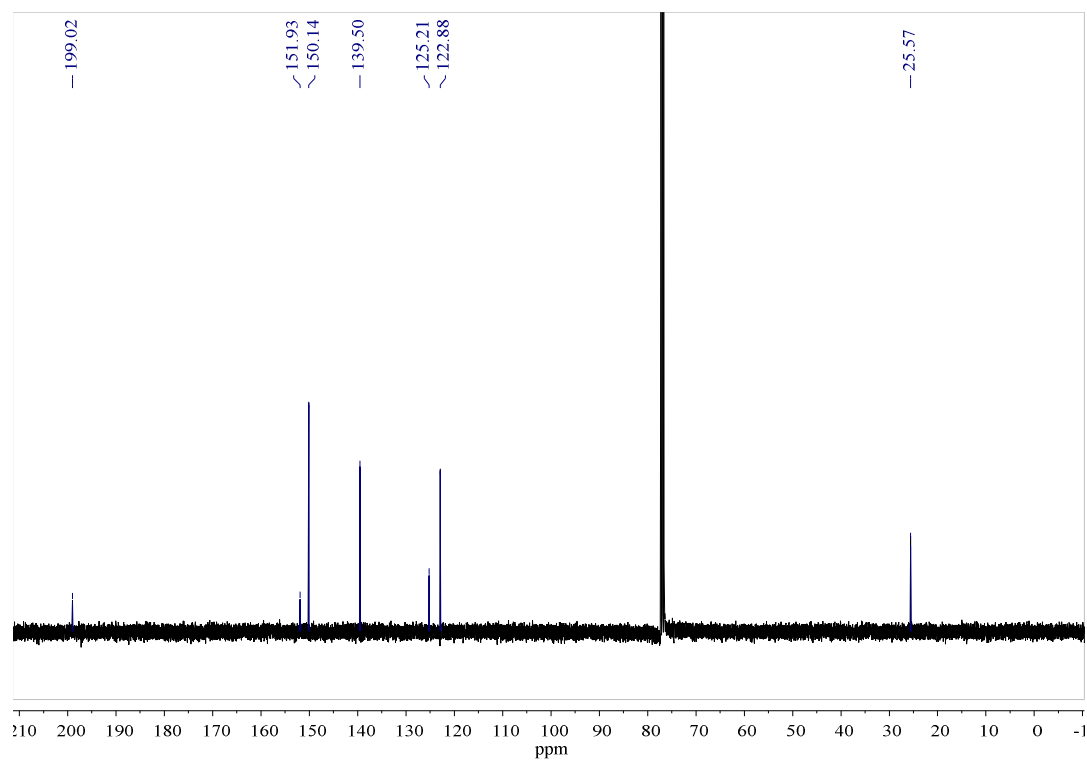

Figure S 7.  $^{13}\text{C}$  NMR spectrum ( $\text{CDCl}_3$ , 100 MHz) of 15.

### Synthesis of 1-(5-((trimethylsilyl)ethynyl)pyridin-2-yl)ethan-1-one (16)

1-(5-bromopyridin-2-yl)ethan-1-one (3.98 g, 20 mmol), Pd(PPh<sub>3</sub>)<sub>2</sub>Cl<sub>2</sub> (140.2 mg, 0.2 mmol) and trimethylsilylacetylene (3.13 mL, 22 mmol) were dissolved in a mixed solvent of 100 mL trimethylamine and 150 mL THF under Ar. To the solution was added CuI (76 mg, 0.4 mmol). The mixture was stirred at 60 °C for 18 h. After cooling down to RT, the mixture was filtered through Celite and the filtrate was concentrated *in vacuo*. The crude product was purified via flash column chromatography (hexanes). A brown oil (4.0 g, 92.0%) was obtained. **<sup>1</sup>H NMR** (CDCl<sub>3</sub>, 400 MHz) δ 8.71 (d, 1H), 7.98 (d, 1H), 7.96 (dd, 1H), 2.71 (s, 3H), 0.28 (s, 9H); **<sup>13</sup>C NMR** (CDCl<sub>3</sub>, 100 MHz) δ 199.09, 151.77, 151.58, 139.56, 123.75, 120.77, 101.66, 100.93, 25.88, 0.34. **HRMS** (EI) *m/z* calculated for C<sub>12</sub>H<sub>6</sub>NOSi<sup>+</sup> (M<sup>+</sup> + H<sup>+</sup>) 218.1001, found 218.0998

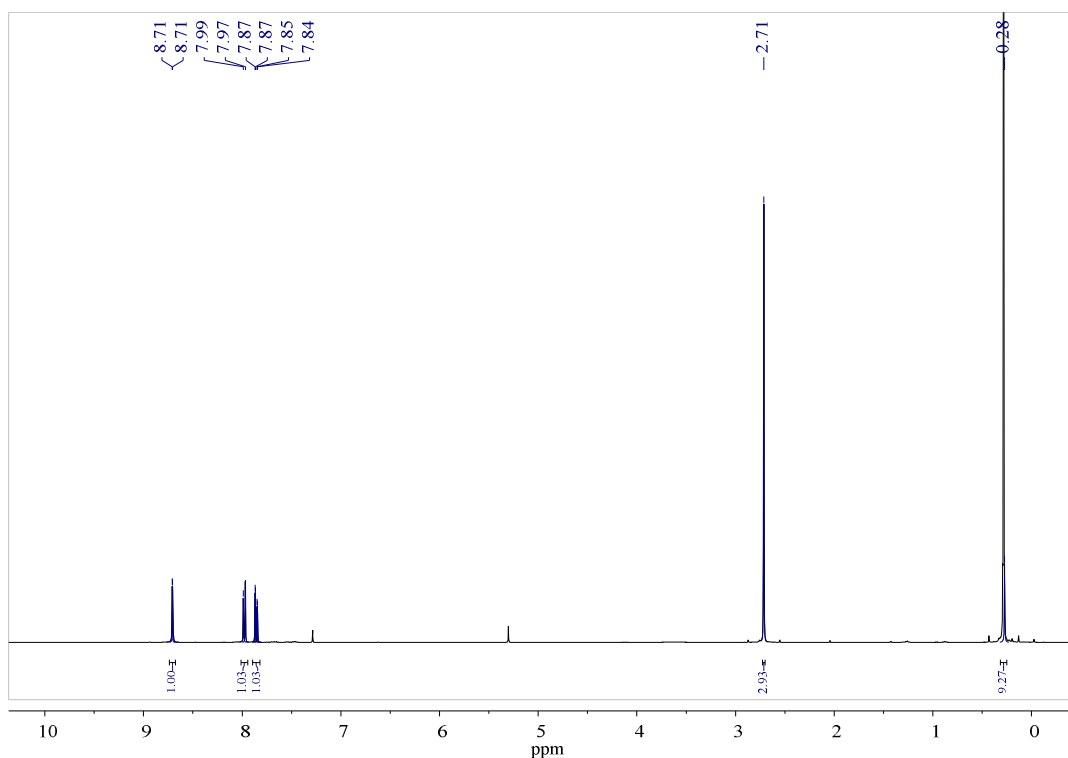

Figure S 8. <sup>1</sup>H NMR spectrum (CDCl<sub>3</sub>, 400 MHz) of 16.

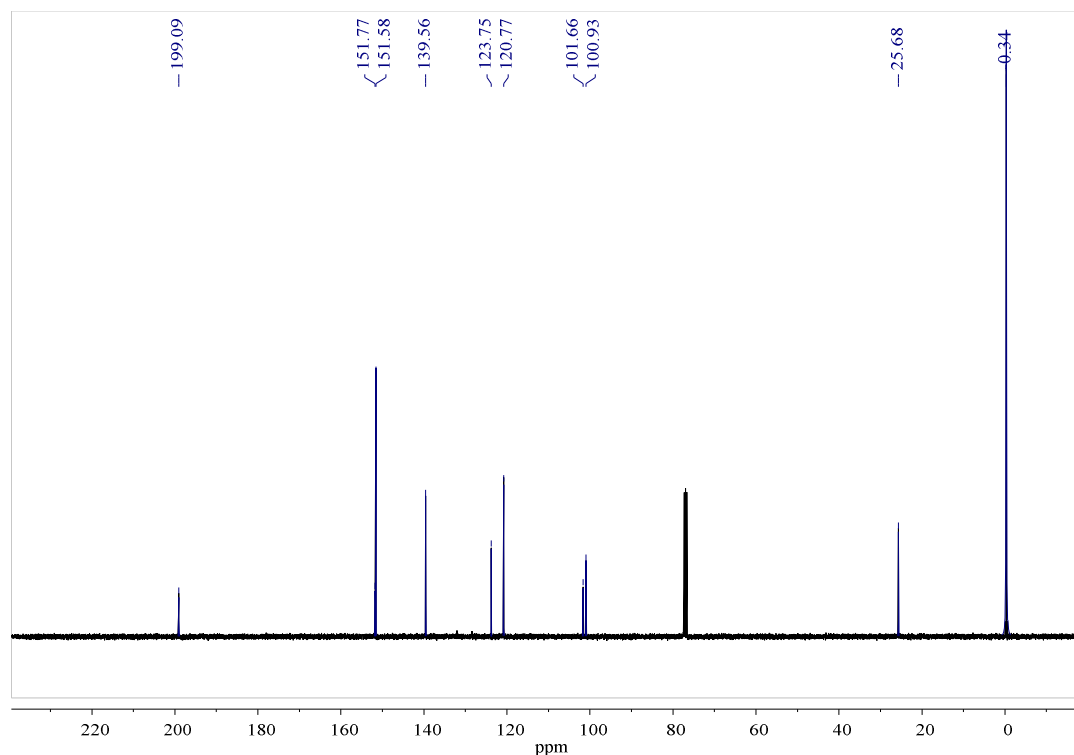

**Figure S 9.**  $^{13}\text{C}$  NMR spectrum ( $\text{CDCl}_3$ , 100 MHz) of **16**.

### **Synthesis of 5,5''-diethynyl-4'-phenyl-2,2':6',2''-terpyridine (PTPy, **17**)**

The synthesis of this compound followed a procedure similar to that of compound **14**. KOH (560 mg, 10 mmol), Benzaldehyde (531.0 mg, 5 mmol) and 1-(5-((trimethylsilyl)ethynyl)pyridin-2-yl)ethan-1-one (2.173 g, 10 mmol) were dissolved in 24 mL EtOH. To the resultant solution was added ammonium hydroxide (14.5 mL, 29.3%) and the mixture was stirred for 3 d. The crude solid was collected via filtration and washed with ethanol. Purification by flash chromatography (dichloromethane/hexanes = 1:1) gave a white powder (350.0 mg, 9.8%).  $^1\text{H}$  NMR ( $\text{CDCl}_3$ , 400 MHz)  $\delta$  8.85 (d, 2H), 8.79 (s, 2H), 8.68 (dd, 2H), 8.00 (d, 2H), 7.93 (d, 2H), 7.55 (m, 3H), 3.35 (s, 2H);  $^{13}\text{C}$  NMR ( $\text{CDCl}_3$ , 100 MHz)  $\delta$  154.75, 151.66, 160.69, 140.51, 137.92, 129.31, 129.05, 127.34, 120.88, 119.95, 119.54, 81.82, 80.242. **HRMS** (EI)  $m/z$  calculated for  $\text{C}_{25}\text{H}_{16}\text{N}_3^+$  ( $\text{M}^+ + \text{H}^+$ ) 358.1344, found 358.1337

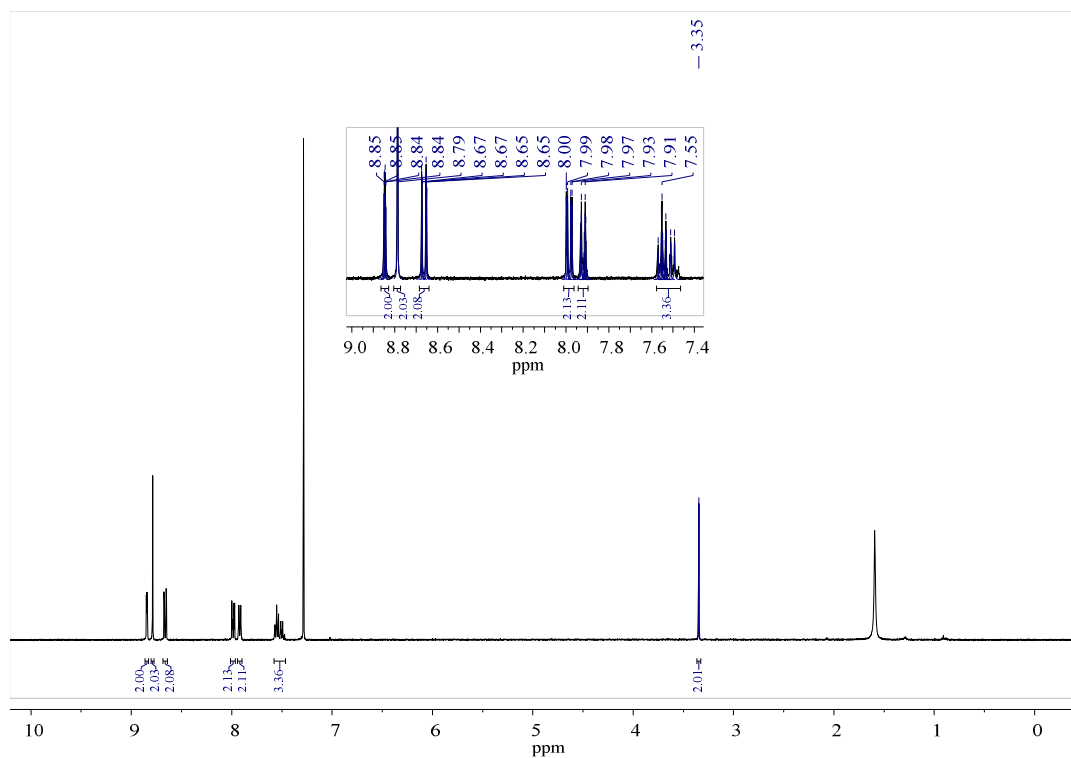

Figure S 10. <sup>1</sup>H NMR spectrum (CDCl<sub>3</sub>, 400 MHz) of 17.

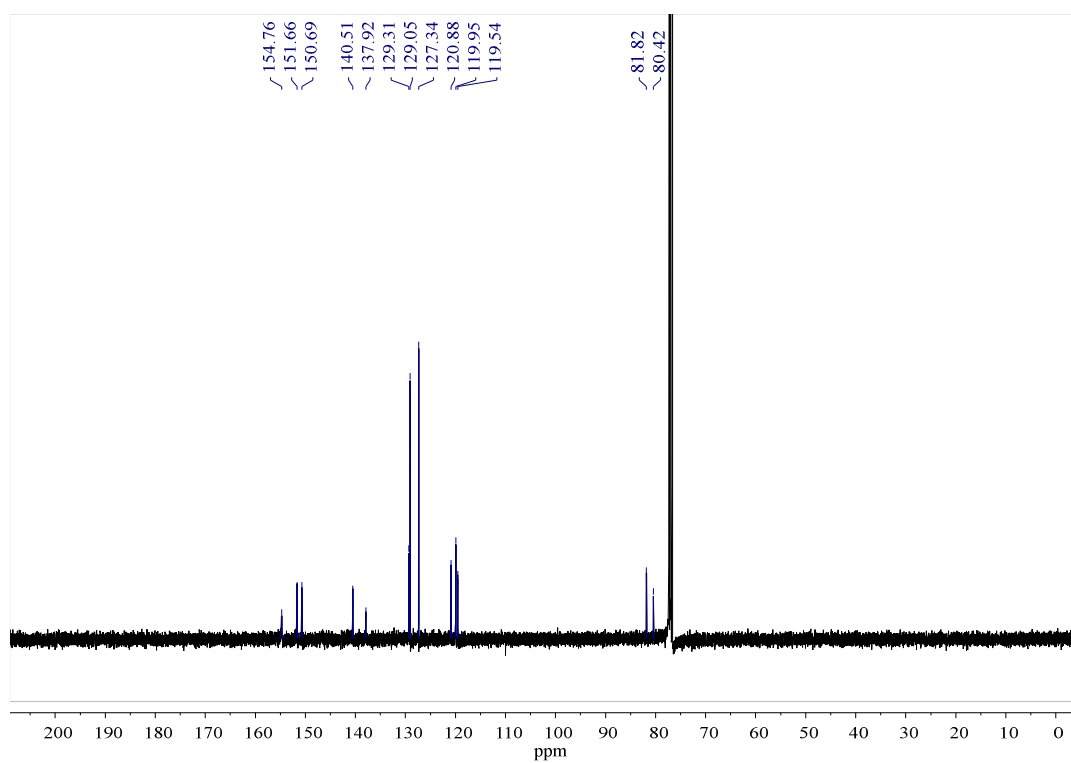

Figure S 11. <sup>13</sup>C NMR spectrum (CDCl<sub>3</sub>, 100 MHz) of 17.

### Synthesis of 5,5''-diethynyl-4'-(pyridin-4-yl)-2,2':6',2''-terpyridine (TPy, 18)

The synthesis of this compound followed a procedure similar to that of compound **14**. To a solution of 4-Pyridinecarboxaldehyde (404 mg, 4 mmol) in 18 mL ethanol was added 1-(5-((trimethylsilyl)ethynyl)pyridin-2-yl)ethan-1-one (1.738 g, 8 mmol). Then ammonium hydroxide (12 mL, 29.3%) and KOH pellets (440 mg, 4 mmol) were added to the mixture. The reaction was stirred at ambient temperature for 3 days. The crude solid was collected via filtration and washed with ethanol. Purification by flash chromatography (dichloromethane) gave a white powder (280.0 mg, 9.8%).  $^1\text{H}$  NMR ( $\text{CDCl}_3$ , 400 MHz)  $\delta$  8.84 (m, 6H), 8.67 (d, 2H), 8.01 (dd, 2H), 8.93 (d, 2H), 3.37 (s, 2H);  $^{13}\text{C}$  NMR ( $\text{CDCl}_3$ , 100 MHz)  $\delta$  155.85, 154.70, 152.25, 149.63, 147.27, 140.05, 121.96, 120.52, 119.70, 119.30, 81.71, 80.58. **HRMS** (EI)  $m/z$  calculated for  $\text{C}_{24}\text{H}_{15}\text{N}_4^+$  ( $\text{M}^+ + \text{H}^+$ ) 359.1297, found 359.1295

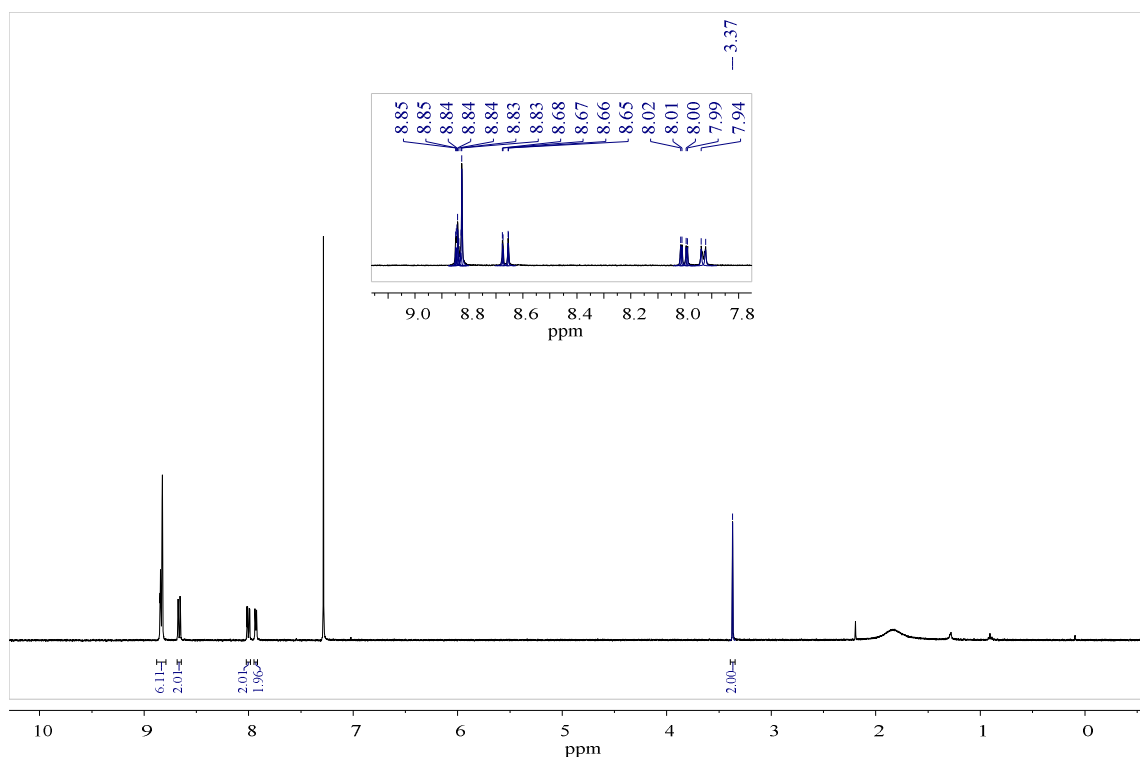

Figure S 12.  $^1\text{H}$  NMR spectrum ( $\text{CDCl}_3$ , 400 MHz) of **18**.

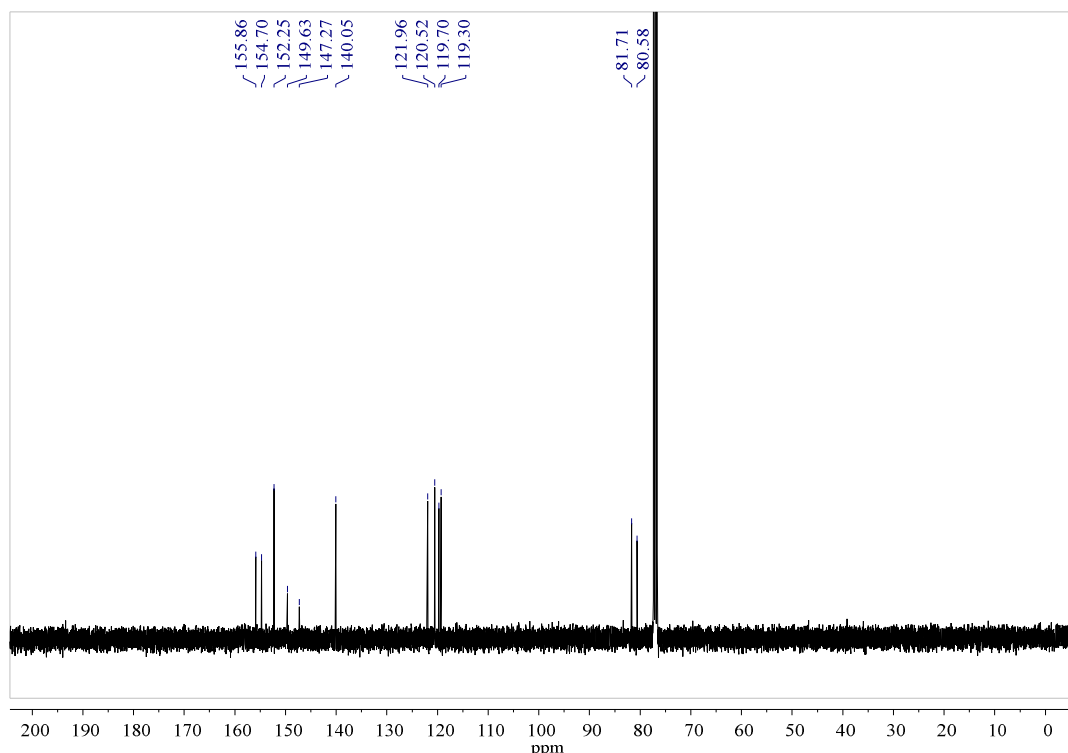

**Figure S 13.**  $^{13}\text{C}$  NMR spectrum ( $\text{CDCl}_3$ , 100 MHz) of **18**.

### General procedure for synthesis of sulfonated pyridyl polyphenylenes

The **0N**, **(1+0)N**, **(1+1)N**, **(3+0)N** and **(3+1)N** polymers were synthesized via Diels-Alder polymerization and purified following previous literature procedures.<sup>1,2</sup> Under Ar diene monomer **7** and the appropriate dienophile monomer were first mixed in nitrobenzene and then stirred at RT for 10 min. The mixture was heated at 180 °C for 3 d. After the reaction was cooled to RT, ethyl acetate was added to the mixture, which was subject to reflux for 6 h. The solid was filtered and washed with ethyl acetate to remove nitrobenzene. The polymer precipitate was then dissolved in DMSO at 80 °C, and re-precipitated into ethyl acetate. Filtration and drying under vacuum at 80 °C overnight yielded the polymer product of triethylammonium form (**Polymer-HNEt<sub>3</sub><sup>+</sup>**).

To a solution of **Polymer-HNEt<sub>3</sub><sup>+</sup>** in methanol was added NaOH methanolic solution. The mixture was stirred at RT for 48 h. Then **Polymer-Na<sup>+</sup>** was filtered, washed with methanol and dried under vacuum, then suspended in water. To the resulting mixture of **Polymer-Na<sup>+</sup>** in water was added 2 M  $\text{H}_2\text{SO}_4$  and the mixture was stirred at RT for 24 h.

After filtration and drying *in vacuo* overnight, the **Polymer-H<sup>+</sup>** was obtained.

### Synthesis of the **sTPPPP-H<sup>+</sup>** polymer, **0N**

Following the general procedure, monomer **7** (0.321 g, 0.226 mmol) and the dienophile monomer **11** (0.820 g, 0.232 mmol) were mixed in 45 mL nitrobenzene. The polymer (**sTPPPP-HNEt<sub>3</sub><sup>+</sup>**) was dried in *in vacuo* overnight to afford a brown solid (0.325 g, 87.3%). **<sup>1</sup>H NMR** (DMSO-*d*<sub>6</sub>, 400 MHz) δ 9.00 (s, 4H), 8.25-6.0 (m, 48H), 3.01 (q, 24H), 1.25 (t, 36H)

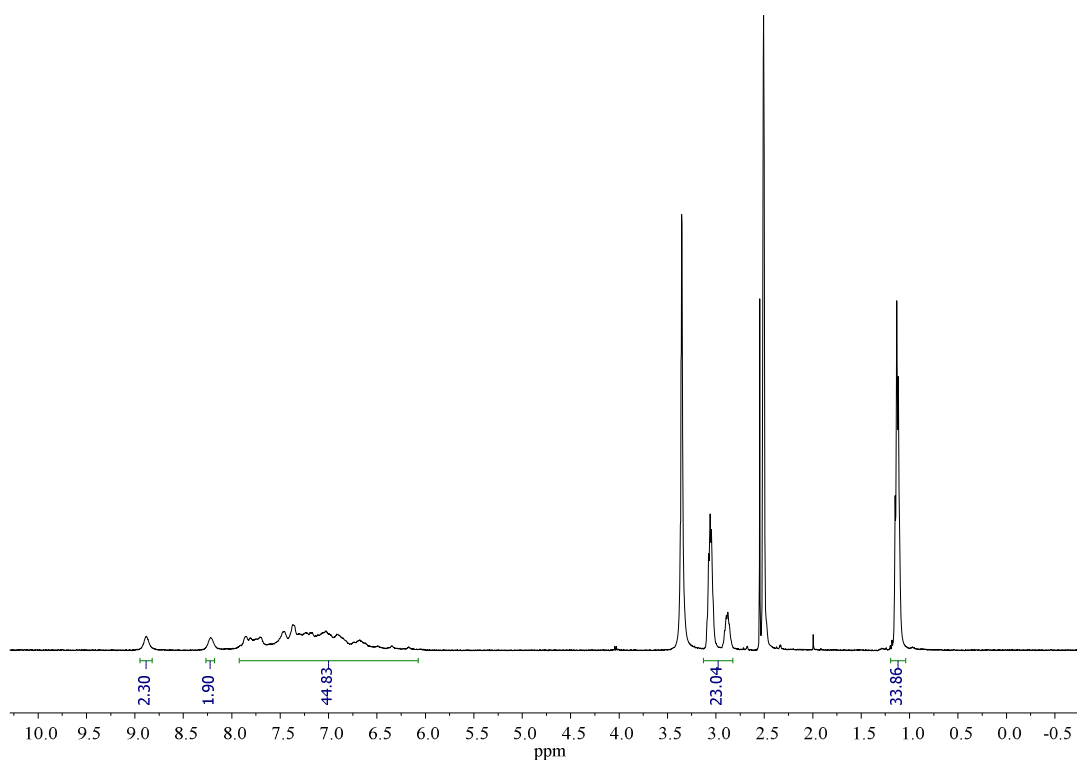

**Figure S 14** **<sup>1</sup>H NMR spectrum (DMSO-*d*<sub>6</sub>, 400 MHz) of sTPPPP-HNEt<sup>+</sup>**

To a solution of **sTPPPP-HNEt<sub>3</sub><sup>+</sup>** (0.300 g) in 10 mL methanol was slowly added a solution of NaOH in methanol (2.0 g NaOH, 5 mL methanol) and the polymer of Na<sup>+</sup> form was isolated via filtration. The obtained **sTPPyPP-Na<sup>+</sup>** was suspended in 10 mL water and combined with 15 mL of 2 M H<sub>2</sub>SO<sub>4</sub>. After filtration, **sTPPyPP-H<sup>+</sup>** was dried *in vacuo* to afford a gray powder (0.225 g, 79.2%). **<sup>1</sup>H NMR** (DMSO-*d*<sub>6</sub>, 400 MHz) δ 8.23-6.1 (m, 48H).

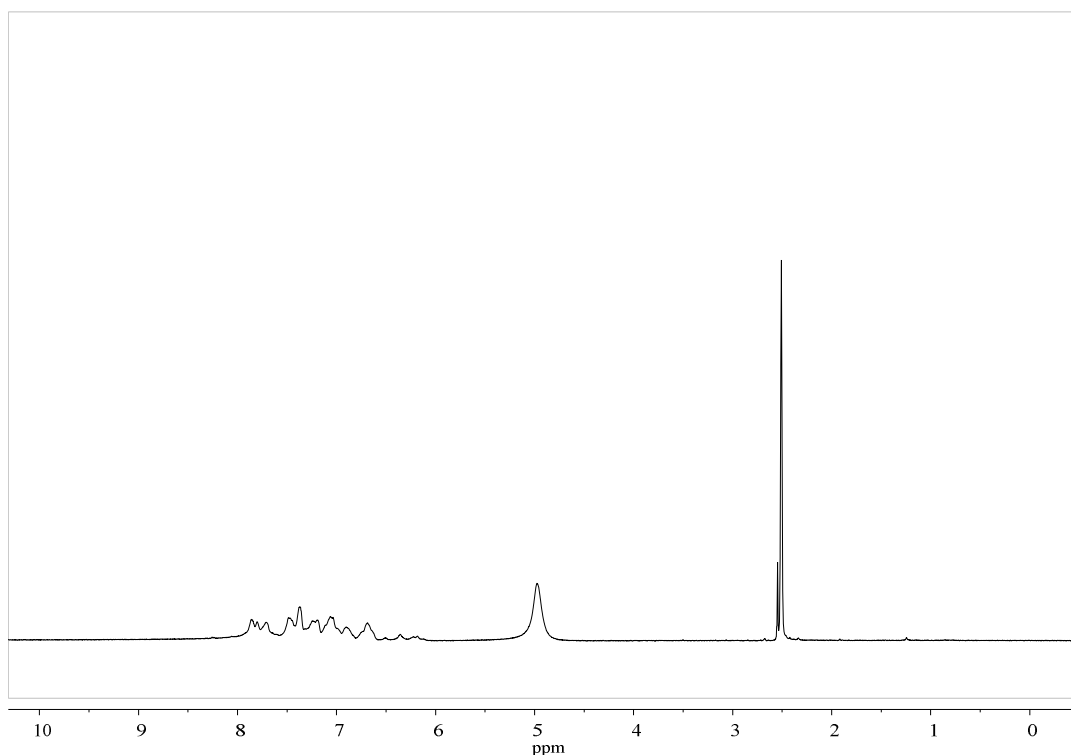

**Figure S 15**  $^1\text{H}$  NMR spectrum (DMSO- $d_6$ , 400 MHz) of sTPPPP -H $^+$ , 0N  
**Synthesis of the sTPPyPP-H $^+$  polymer, (1+0)N**

Following the general procedure, monomer **7** (0.850 g, 0.7 mmol) and the dienophile monomer **12** (0.215 g, 0.7 mmol) were mixed in 45 mL nitrobenzene. The polymer (sTPPyPP-HNEt $_3^+$ ) was dried *in vacuo* overnight to afford a brown solid (1.02 g, 99.2%).  $^1\text{H}$  NMR (DMSO- $d_6$ , 400 MHz)  $\delta$  8.9 (s, 4H), 8.23-6.50 (m, 47H), 3.00 (q, 24H), 1.26 (t, 36H)



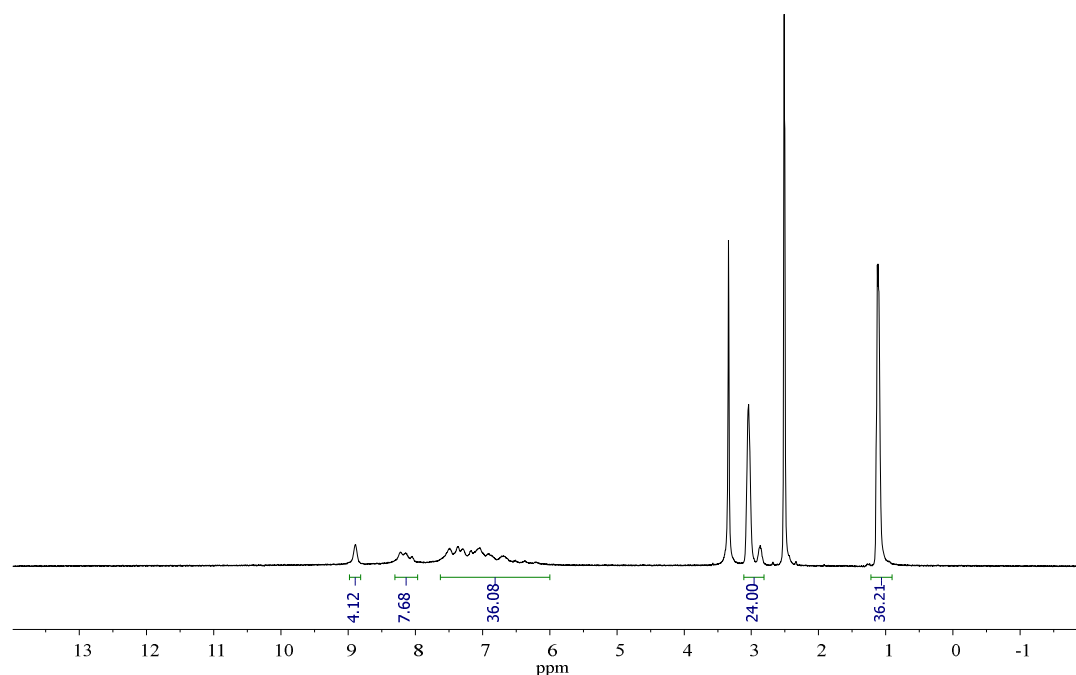

**Figure S 16**  $^1\text{H}$  NMR spectrum (DMSO- $d_6$ , 400 MHz) of sTPPyPP -HNEt $^+$

To a solution of sTPPyPP-HNEt $_3^+$  (1.01 g) in 50 mL methanol was slowly added a solution of NaOH in methanol (6.0 g NaOH, 45 mL methanol) and the polymer of Na $^+$  form was isolated via filtration. The obtained sTPPyPP-Na $^+$  was suspended in 45 mL water and combined with 45 mL of 2 M H $_2$ SO $_4$ . After filtration, sTPPyPP-H $^+$  was dried *in vacuo* to afford a gray powder (0.63 g, 79.2%).  $^1\text{H}$  NMR (DMSO- $d_6$ , 400 MHz)  $\delta$  9.23-6.03 (m, 47H).

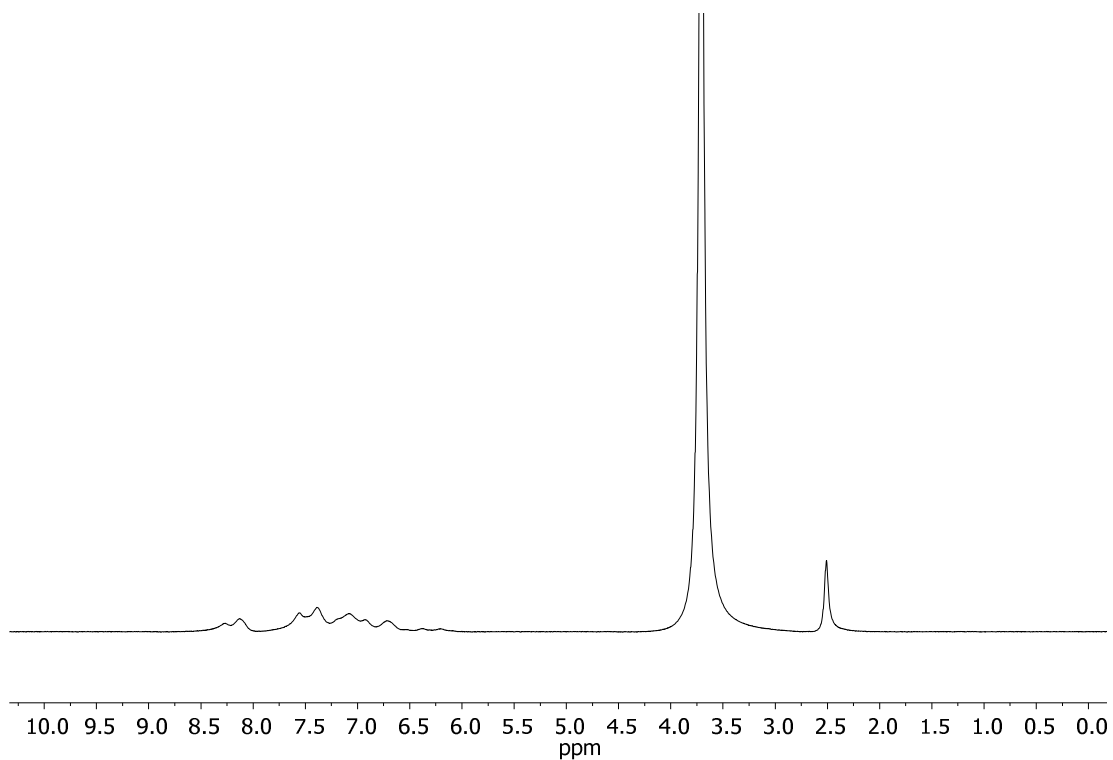

**Figure S 17  $^1\text{H}$  NMR spectrum (DMSO- $d_6$ , 400 MHz) of sTPPyPP - $\text{H}^+$ , (1+0)N**  
**Synthesis of the sBPBPyPP- $\text{H}^+$  polymer, (1+1)N**

Following the general procedure, monomer **7** (0.991 g, 0.7 mmol) and the dienophile monomer **9** (0.25 g, 0.7 mmol) were mixed in 45 mL nitrobenzene. The polymer (sBPBPyPP- $\text{HNEt}_3^+$ ) was dried *in vacuo* overnight to afford a brown solid (1.17 g, 96.7%).  
 $^1\text{H}$  NMR (DMSO- $d_6$ , 400 MHz)  $\delta$  9.02-6.27 (m, 46H), 3.00 (q, 24H), 1.22 (t, 36H)

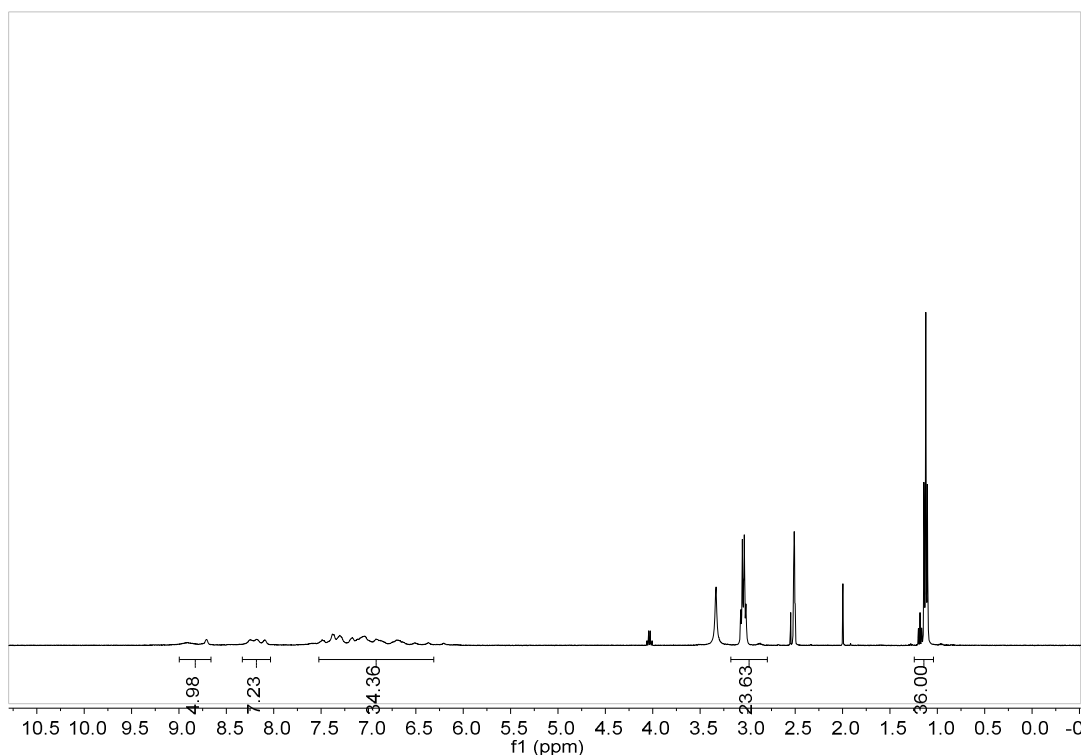

**Figure S 18.  $^1\text{H}$  NMR spectrum (DMSO- $d_6$ , 400 MHz) of sPTPyPP-HNEt $^+$ .**

To a solution of **sBPBPpyPP-HNEt $_3^+$**  (1.17 g) in 45 mL methanol was slowly added a solution of NaOH in methanol (5.8 g NaOH, 45 mL methanol) and the polymer of Na $^+$  form was isolated via filtration. The obtained **sBPBPpyPP-Na $^+$**  was suspended in 45 mL water and combined with 45 mL of 2 M H $_2$ SO $_4$ . After filtration, **sBPBPpyPP-H $^+$**  was dried *in vacuo* to afford a gray powder (0.612 g, 66.7%).  $^1\text{H}$  NMR (DMSO- $d_6$ , 400 MHz)  $\delta$  9.25-6.0 (m, 46H).

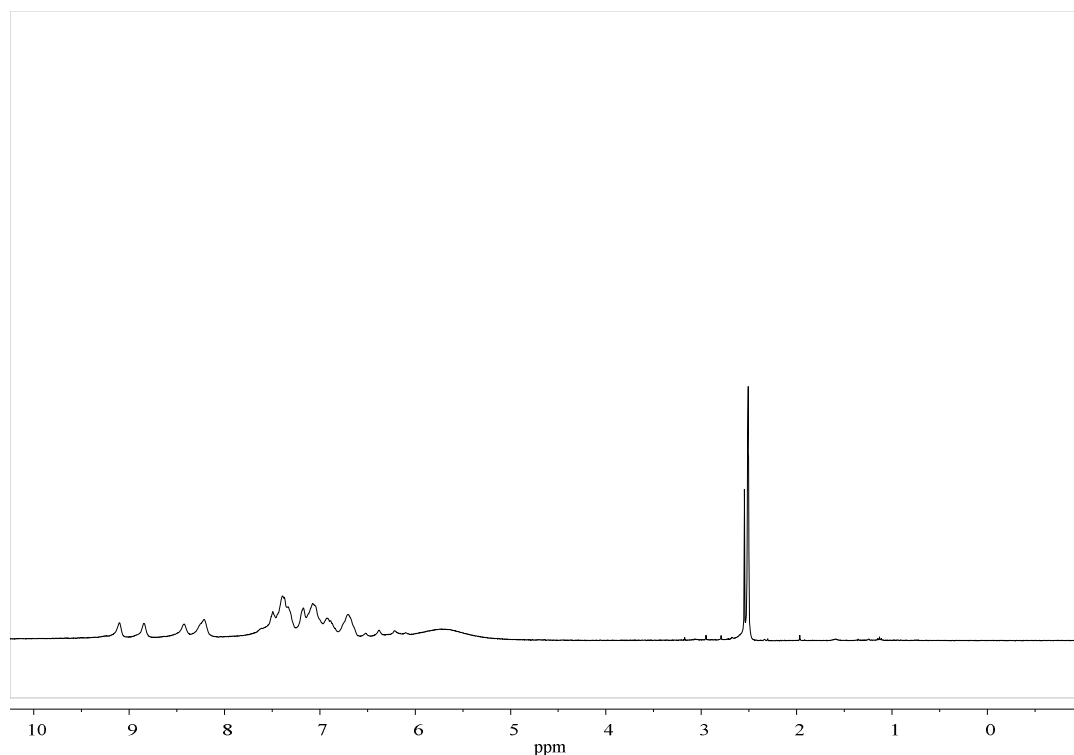

**Figure S 19.**  $^1\text{H}$  NMR spectrum (DMSO- $d_6$ , 400 MHz) of sBPBPpyPP- $\text{H}^+$ , (1+1)N.

#### **Synthesis of the sPTPyPP- $\text{H}^+$ polymer, (3+0)N**

Following the general procedure, monomer **7** (0.849 mg, 0.6 mmol) and the dienophile monomer **12** (0.217 g, 0.6 mmol) were mixed in 40 mL nitrobenzene. The polymer (sPTPyPP- $\text{HNEt}_3^+$ ) was dried in a vacuum oven overnight to afford a brown solid (0.720 g, 69.9%).  $^1\text{H}$  NMR (DMSO- $d_6$ , 400 MHz)  $\delta$  9.0-6.3 (m, 45H), 3.01 (q, 24H), 1.25 (t, 36H)

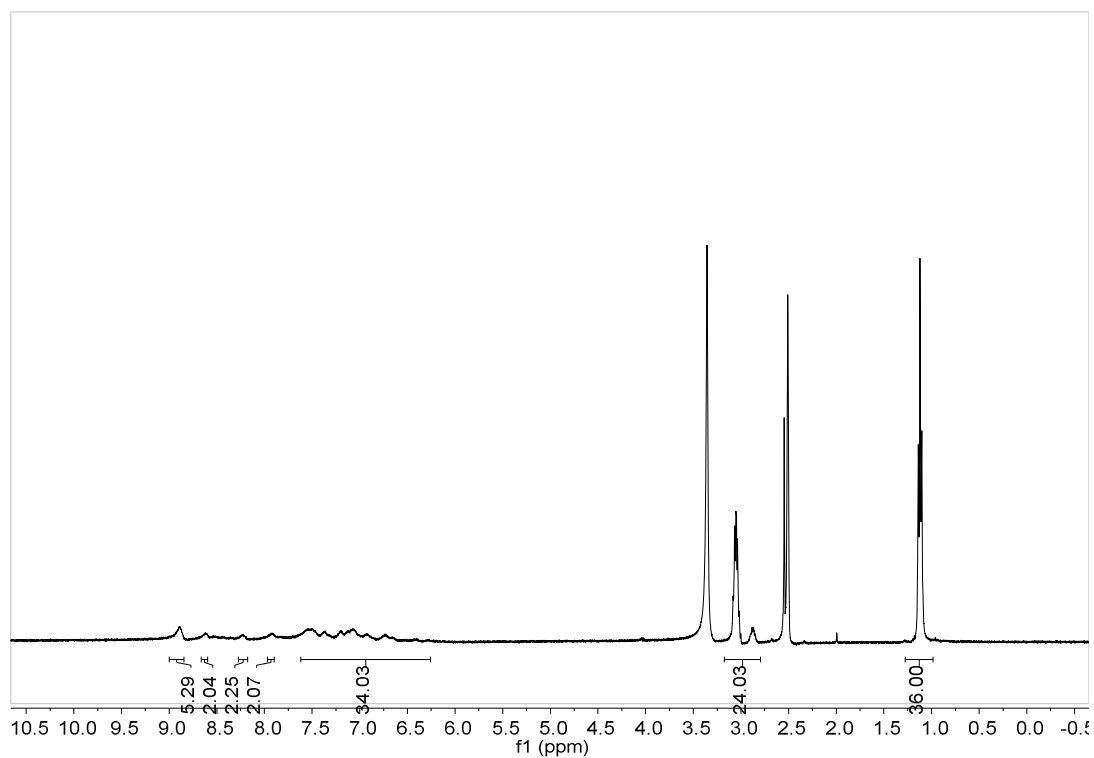

**Figure S 20.**  $^1\text{H}$  NMR spectrum (DMSO- $d_6$ , 400 MHz) of sPTPyPP-HNEt $^{3+}$ .

To a solution of sPTPyPP-HNEt $^{3+}$  (0.700 g) in 40 mL methanol was slowly added a solution of NaOH in methanol (3.5 g NaOH, 40 mL methanol) and the polymer of Na $^+$  form was isolated via filtration. The obtained sPTPyPP-Na $^+$  was suspended in 40 mL water and combined with 40 mL of 2 M H $_2$ SO $_4$ . After filtration, sPTPyPP-H $^+$  was dried *in vacuo* to afford a brown powder (520.0 mg, 66.1%).  $^1\text{H}$  NMR (DMSO- $d_6$ , 400 MHz)  $\delta$  9.0-6.0 (m, 45H).

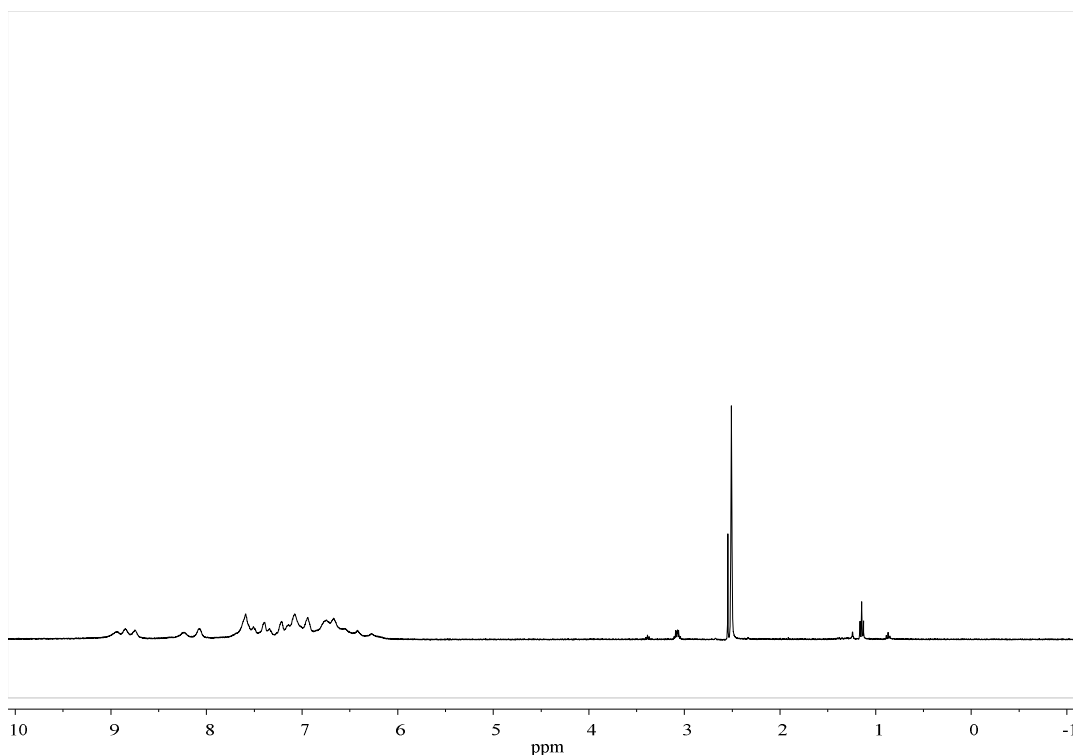

**Figure S 21.  $^1\text{H}$  NMR spectrum (DMSO- $d_6$ , 400 MHz) of sTPyPP-H $^+$ , (3+0)N.**

#### **Synthesis of the sTPyPP-H $^+$ polymer, (3+1)N**

Following the general procedure, monomer **7** (0.707 mg, 0.5 mmol) and the dienophile monomer **13** (0.185 g, 0.5 mmol) were mixed in 35 mL nitrobenzene. The polymer (sTPyPP -HNEt $_3^+$ ) was dried in a vacuum oven overnight to afford a brown solid (0.610 g, 71.0%).  $^1\text{H}$  NMR (DMSO- $d_6$ , 400 MHz)  $\delta$  9.0-6.3 (m, 44H), 3.01 (q, 24H), 1.25 (t, 36H).

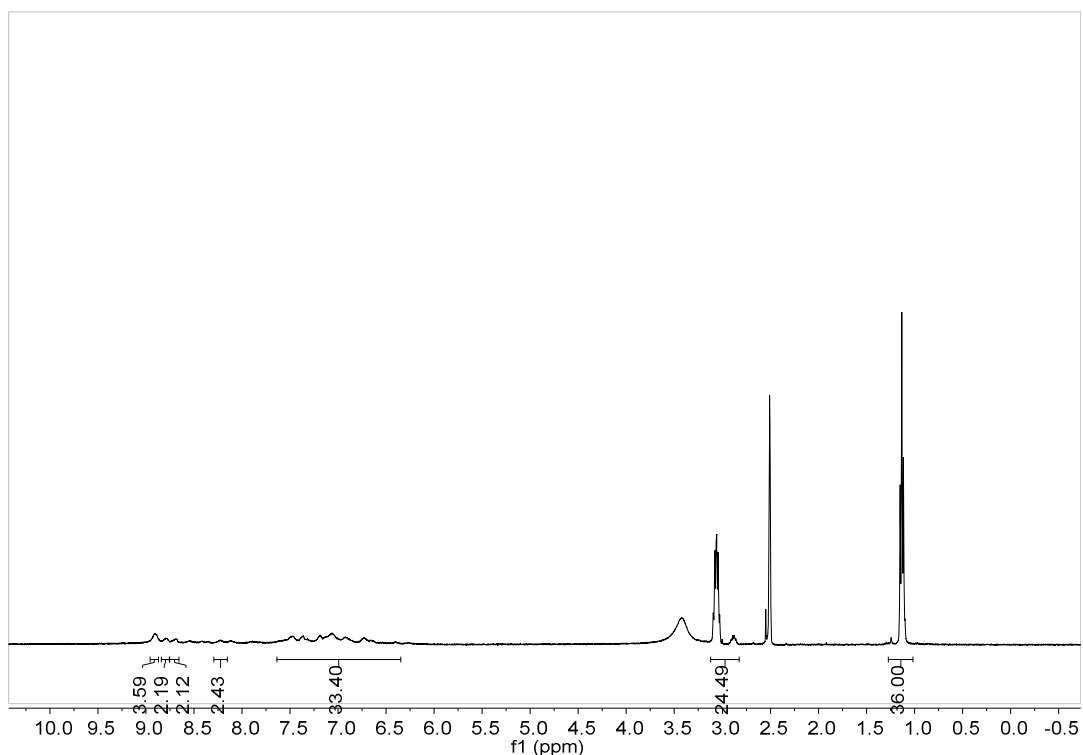

**Figure S 22.**  $^1\text{H}$  NMR spectrum ( $\text{DMSO-}d_6$ , 400 MHz) of  $\text{sTPyPP-H}^+\text{NEt}_3^+$ .

To a solution of  $\text{sTPyPP-HNEt}_3^+$  (0.600 g) in 34 mL methanol was slowly added a solution of NaOH in methanol (2.9 g NaOH, 34 mL methanol) and the polymer of  $\text{Na}^+$  form was isolated via filtration. The obtained  $\text{sTPyPP-Na}^+$  was suspended in 34 mL water and combined with 34 mL of 2 M  $\text{H}_2\text{SO}_4$ . After filtration,  $\text{sTPyPP-H}^+$  was dried *in vacuo* to afford a gray powder (413.0 mg, 62.9%).  $^1\text{H}$  NMR ( $\text{DMSO-}d_6$ , 400 MHz)  $\delta$  9.1-6.0 (m, 44H).

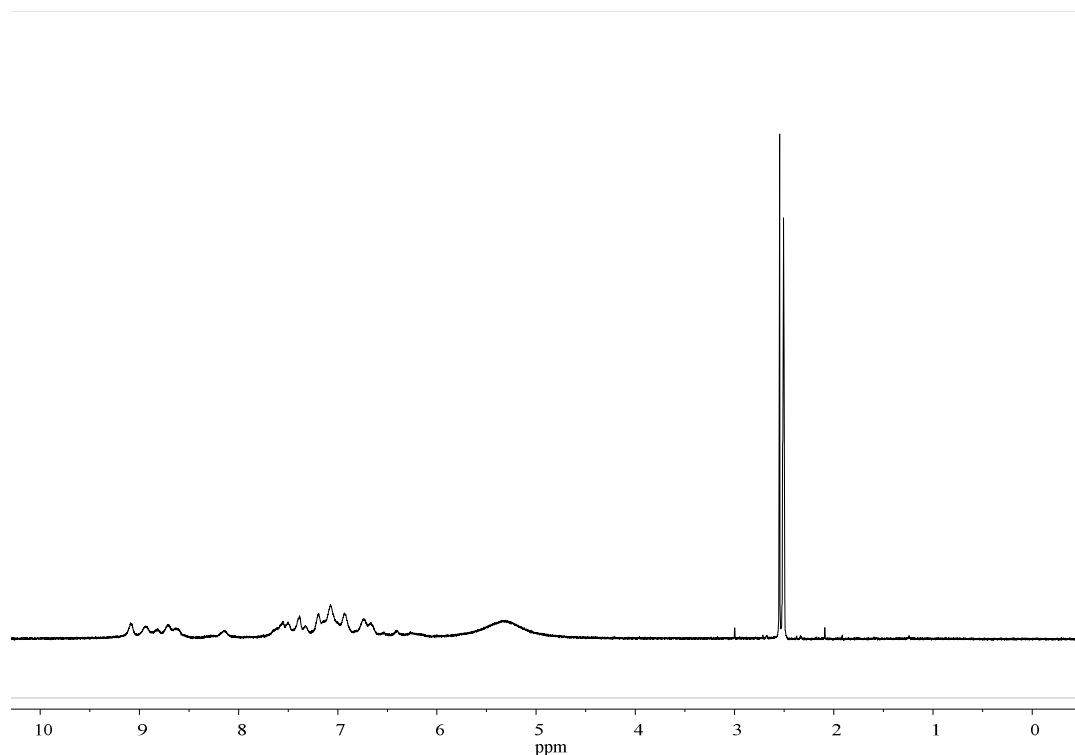

**Figure S 23.**  $^1\text{H}$  NMR spectrum ( $\text{DMSO-}d_6$ , 400 MHz) of sTPyPP- $\text{H}^+$ , (3+1)N.

#### **Membrane preparation**

A 5 wt% polymeric solution was prepared and filtered through a sintered glass funnel. The resulting filtrate was poured into a glass petri dish, which was subject to a vacuum oven at 60 °C for 12 h. Water was added to help to obtain the polymer membrane. The membrane was then soaked in 0.5 M  $\text{H}_2\text{SO}_4$  for 24 h, and subsequently washed with water for three times to remove residual acid. Membranes were dried under vacuum at 80 °C overnight.

#### **4. Characterization methods and results**

##### **Mechanical strength measurements**



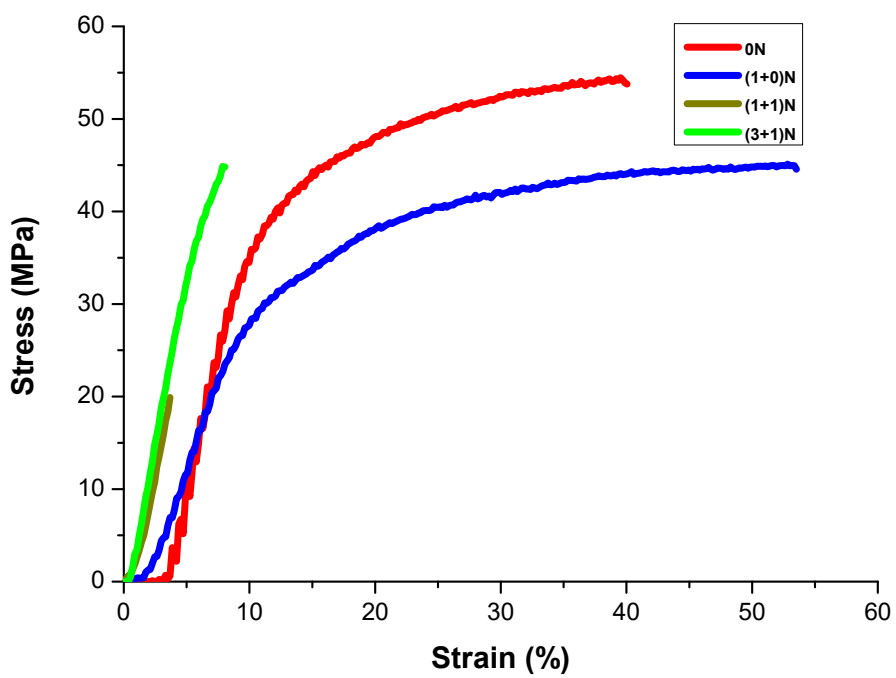

Figure S 24. Strain vs. Stress curves under ambient condition (23 °C, 50% RH).

## Transient diffusion results

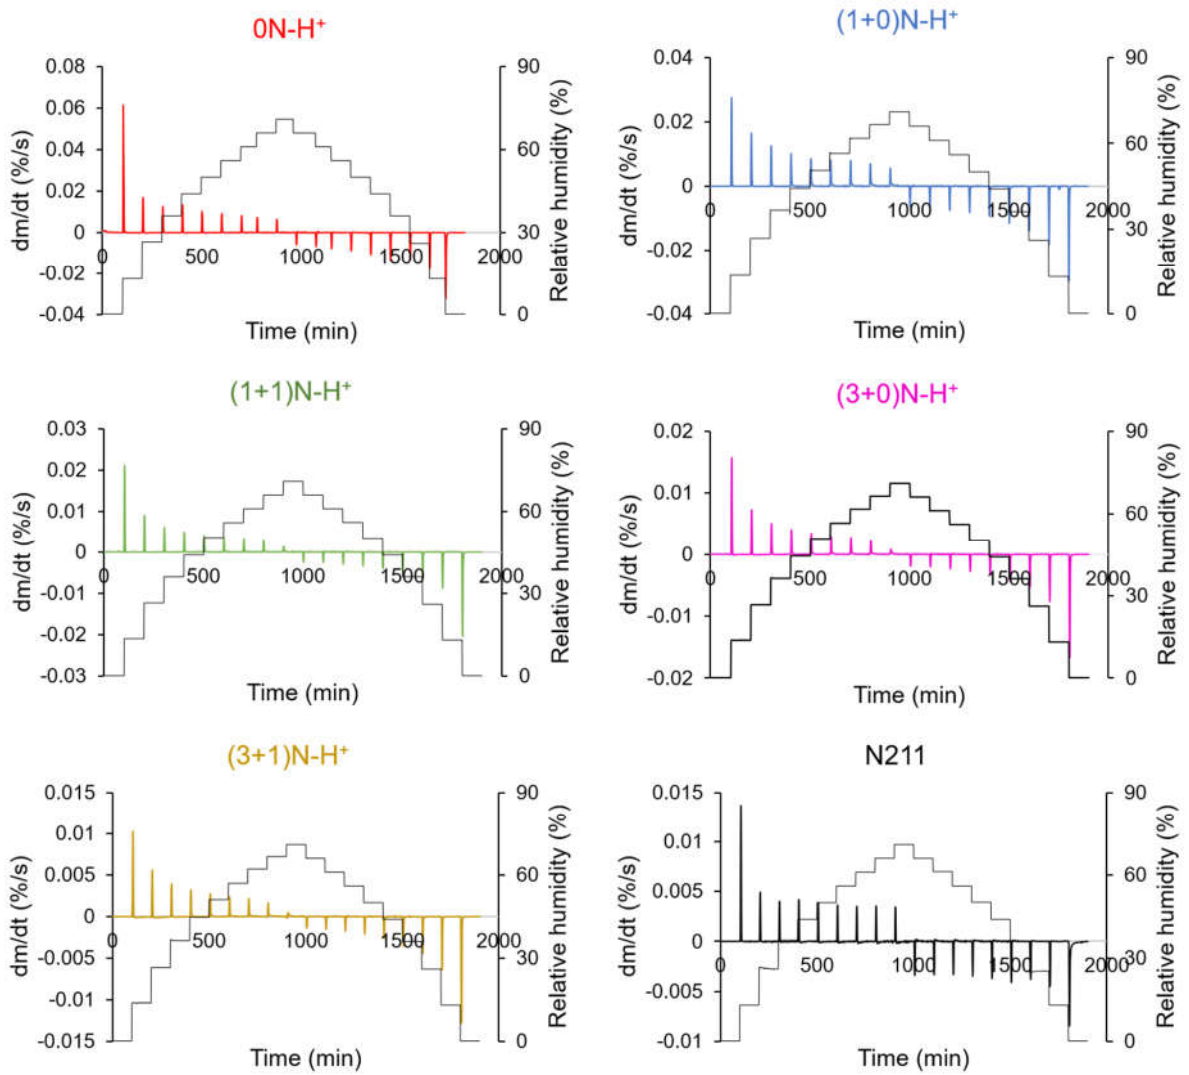

**Figure S 25. Time-dependent transient water diffusion of membranes in a full isotherm cycle under 80 °C, instantaneous mass-change rate (primary axis),  $dm/dt$ , and relative humidity steps (secondary axis) over time.**

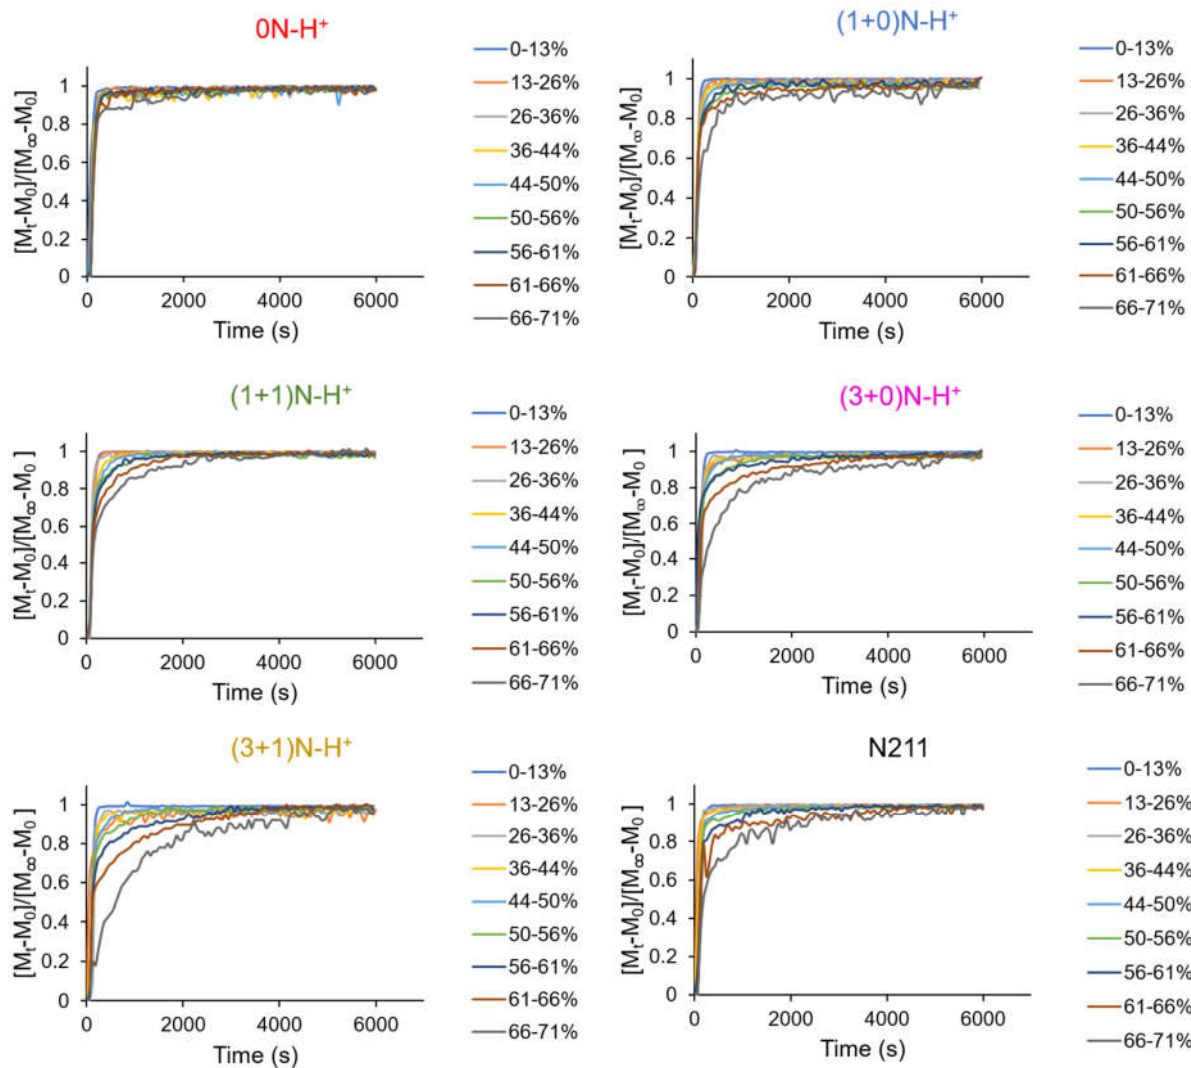

**Figure S 26** Normalized water uptake,  $[M_t - M_0] / [M_\infty - M_0]$ , over time in sorption period under 80 °C.

**Table S 1.** Effective rate constant of diffusion,  $k_{\text{sorp}}$ , for membranes under 80 °C

| RH range | $k_{\text{sorp}}$ ( $\text{s}^{-1}$ ) |               |               |               |               |             |
|----------|---------------------------------------|---------------|---------------|---------------|---------------|-------------|
|          | <b>0N</b>                             | <b>(1+0)N</b> | <b>(1+1)N</b> | <b>(3+0)N</b> | <b>(3+1)N</b> | <b>N211</b> |
| 0-13%    | 0.81                                  | 0.52          | 1.3           | 0.67          | 0.69          | 0.71        |
| 13-26%   | 0.56                                  | 0.27          | 0.54          | 0.29          | 0.29          | 0.49        |
| 26-36%   | 0.39                                  | 0.12          | 0.30          | 0.16          | 0.17          | 0.28        |
| 36-44%   | 0.099                                 | 0.086         | 0.19          | 0.096         | 0.10          | 0.14        |
| 44-50%   | 0.077                                 | 0.069         | 0.17          | 0.065         | 0.056         | 0.045       |
| 50-56%   | 0.042                                 | 0.051         | 0.11          | 0.031         | 0.018         | 0.024       |
| 56-61%   | 0.033                                 | 0.045         | 0.061         | 0.016         | 0.0079        | 0.014       |
| 61-66%   | 0.019                                 | 0.032         | 0.026         | 0.0080        | 0.0050        | 0.0082      |
| 66-71%   | 0.0067                                | 0.013         | 0.018         | 0.0050        | 0.0027        | 0.0053      |

**Table S 2.** Transient diffusivity,  $D$ , for membranes under 80 °C

| RH step | D (cm <sup>2</sup> /s) |                      |                      |                      |                      |                      |
|---------|------------------------|----------------------|----------------------|----------------------|----------------------|----------------------|
|         | 0N <sup>a</sup>        | (1+0)N <sup>b</sup>  | (1+1)N <sup>c</sup>  | (3+0)N <sup>d</sup>  | (3+1)N <sup>e</sup>  | N211 <sup>f</sup>    |
| 0-13%   | $9.9 \times 10^{-6}$   | $5.3 \times 10^{-6}$ | $5.2 \times 10^{-6}$ | $4.9 \times 10^{-6}$ | $4.7 \times 10^{-6}$ | $4.4 \times 10^{-6}$ |
| 13-26%  | $6.9 \times 10^{-6}$   | $2.8 \times 10^{-6}$ | $2.2 \times 10^{-6}$ | $2.1 \times 10^{-6}$ | $2.0 \times 10^{-6}$ | $3.1 \times 10^{-6}$ |
| 26-36%  | $4.8 \times 10^{-6}$   | $1.3 \times 10^{-6}$ | $1.2 \times 10^{-6}$ | $1.2 \times 10^{-6}$ | $1.2 \times 10^{-6}$ | $1.8 \times 10^{-6}$ |
| 36-44%  | $1.4 \times 10^{-6}$   | $9.4 \times 10^{-7}$ | $7.6 \times 10^{-7}$ | $7.0 \times 10^{-7}$ | $6.8 \times 10^{-7}$ | $8.8 \times 10^{-7}$ |
| 44-50%  | $1.0 \times 10^{-6}$   | $8.0 \times 10^{-7}$ | $6.8 \times 10^{-7}$ | $4.8 \times 10^{-7}$ | $3.8 \times 10^{-7}$ | $2.8 \times 10^{-7}$ |
| 50-56%  | $8.1 \times 10^{-7}$   | $5.9 \times 10^{-7}$ | $4.4 \times 10^{-7}$ | $2.3 \times 10^{-7}$ | $1.2 \times 10^{-7}$ | $1.5 \times 10^{-7}$ |
| 56-61%  | $6.4 \times 10^{-7}$   | $5.2 \times 10^{-7}$ | $2.4 \times 10^{-7}$ | $1.2 \times 10^{-7}$ | $5.3 \times 10^{-8}$ | $8.7 \times 10^{-8}$ |
| 61-66%  | $4.1 \times 10^{-7}$   | $3.9 \times 10^{-7}$ | $1.0 \times 10^{-7}$ | $5.8 \times 10^{-8}$ | $3.4 \times 10^{-8}$ | $5.1 \times 10^{-8}$ |
| 66-71%  | $1.6 \times 10^{-7}$   | $1.6 \times 10^{-7}$ | $7.2 \times 10^{-8}$ | $3.7 \times 10^{-8}$ | $1.8 \times 10^{-8}$ | $3.3 \times 10^{-8}$ |

<sup>a</sup> thickness at 0-36% RH was 35  $\mu\text{m}$ , 36-50% RH was 37  $\mu\text{m}$ , 50-61% RH was 44  $\mu\text{m}$ , 61-66 % RH was 46  $\mu\text{m}$ , and 66-71 %RH was 49  $\mu\text{m}$ .

<sup>b</sup> thickness at 0-26% RH was 32  $\mu\text{m}$ , 26-44% RH was 33  $\mu\text{m}$ , 44-61% RH was 34  $\mu\text{m}$ , 61-71% RH was 35  $\mu\text{m}$ .

<sup>c</sup> thickness throughout RH range was 20  $\mu\text{m}$ .

<sup>d</sup> thickness throughout RH range was 27  $\mu\text{m}$ .

<sup>e</sup> thickness throughout RH range was 26  $\mu\text{m}$ .

<sup>f</sup> thickness throughout RH range was 25  $\mu\text{m}$ .

## 5. References

- 1 T. J. G. Skalski, B. Britton, T. J. Peckham and S. Holdcroft, *J. Am. Chem. Soc.*, 2015, **137**, 12223–12226.
- 2 M. Adamski, T. J. G. Skalski, B. Britton, T. J. Peckham, L. Metzler and S. Holdcroft, *Angew. Chem. Int. Ed.*, 2017, **56**, 9058–9061.
- 3 S. Xu, M. Adamski, M. Killer, E. M. Schibli, B. J. Frisken and S. Holdcroft, *Macromolecules*, 2019, **52**, 2548–2559.
- 4 G. Henrich, P. D. Ortiz, E. Cavero, R. E. Hanes and J. L. Serrano, *Eur. J. Org. Chem.*, 2008, **2008**, 4575–4579.
- 5 B. P. Dash, R. Satapathy, E. R. Gaillard, K. M. Norton, J. A. Maguire, N. Chug and N. S. Hosmane, *Inorg. Chem.*, 2011, **50**, 5485–5493.
- 6 J. Huo, N. Arulsamy and J. O. Hoberg, *Dalton Trans.*, 2011, **40**, 7534–7540.
- 7 J. J. Danon, D. A. Leigh, P. R. McGonigal, J. W. Ward and J. Wu, *J. Am. Chem. Soc.*, 2016, **138**, 12643–12647.
